# Supplementary material for: Role of the androgen receptor in breast cancer and preclinical analysis of enzalutamide
Source: PubMed Central journal article supplement (PMC3978822; doi:10.1186/bcr3599), 2014-01-22
Supplement: bcr3599-S3.pdf [file bcr3599-S3.pdf]

**MDA-453**

**Cytosolic**

**Nuclear**

**Veh**

**Enza**

**DHT**

**DHT+Enza**

**Veh**

**Enza**

**DHT**

**DHT+Enza**

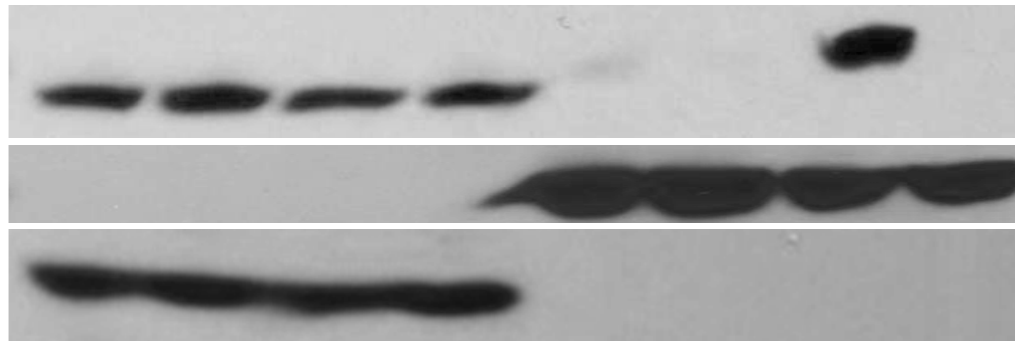

**AR**

**Topo1**

**GAPDH**
