# Supplementary material for: Role of the androgen receptor in breast cancer and preclinical analysis of enzalutamide
Source: PubMed Central journal article supplement (PMC3978822; doi:10.1186/bcr3599), 2014-01-22

**A**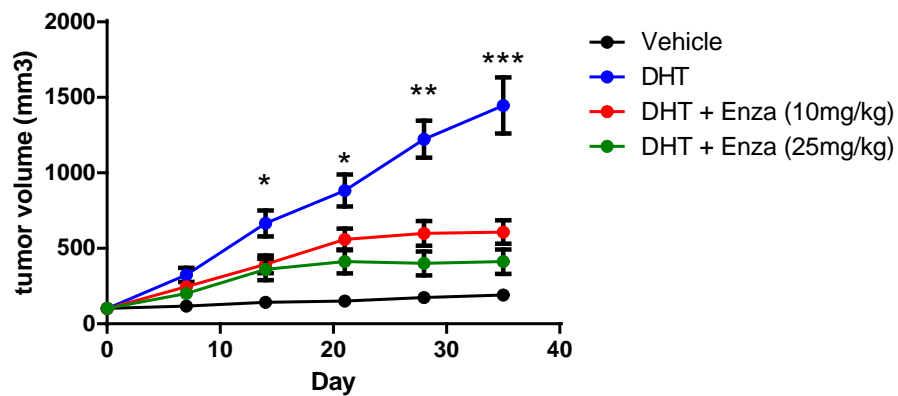**B**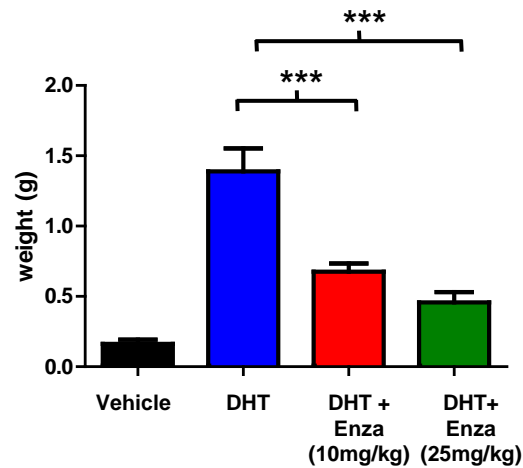**C**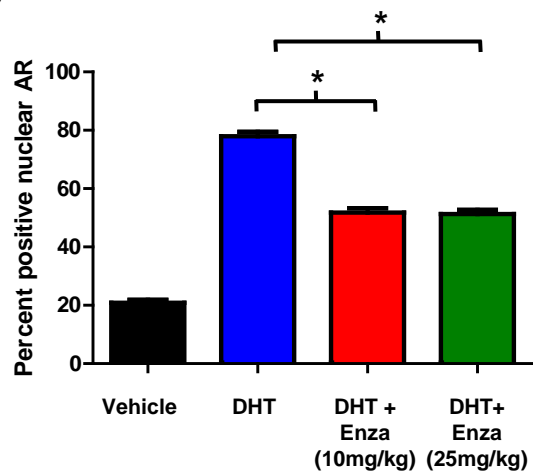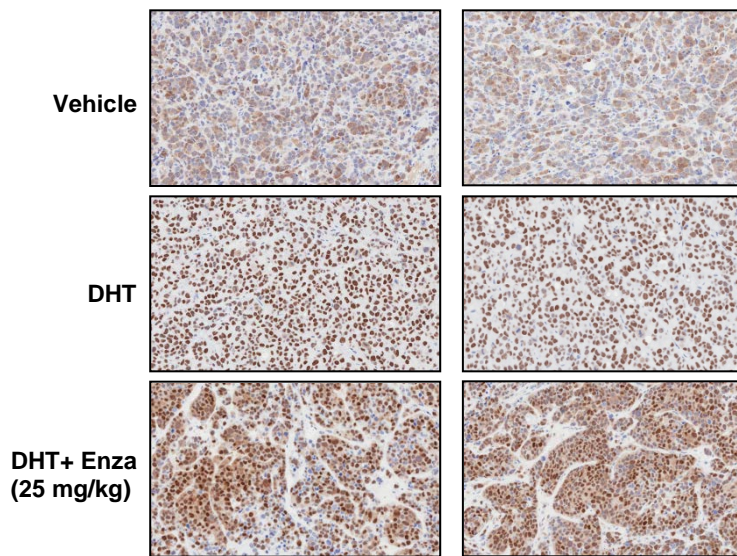

Supplement: bcr3599-S4.pdf [file bcr3599-S4.pdf]
