# Supplementary material for: Role of the androgen receptor in breast cancer and preclinical analysis of enzalutamide
Source: PubMed Central journal article supplement (PMC3978822; doi:10.1186/bcr3599), 2014-01-22

## MCF7 xenograft experiments

A.

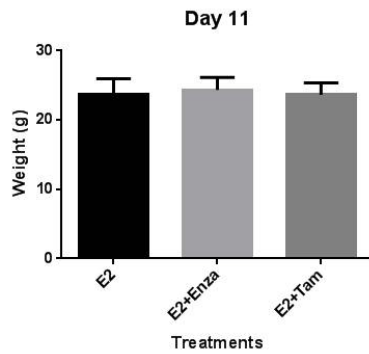

B.

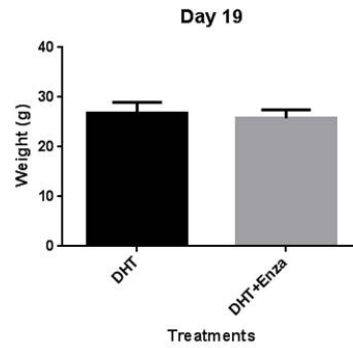

## MDA-MB-453 xenograft experiment

C.

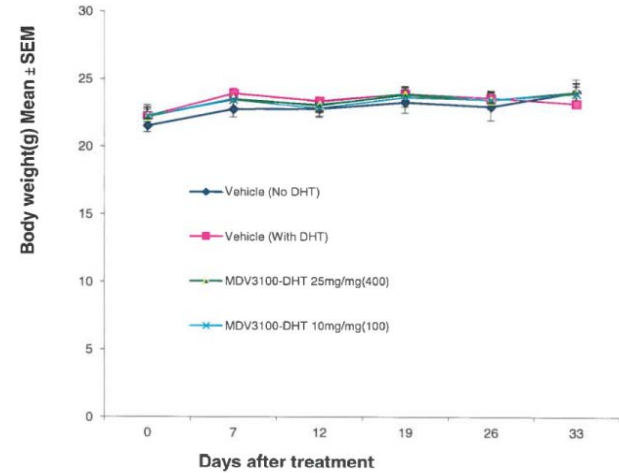

Supplement: bcr3599-S6.pdf [file bcr3599-S6.pdf]
